# Supplementary material
Source: PubMed Central journal article supplement (PMC4165453)
Supplement: ac501418g_si_001.pdf [file ac501418g_si_001.pdf]

**Supporting Information for:**

# Folding-upon-Binding and Signal-on Electrochemical DNA Sensor with High Affinity and Specificity

*Andrea Idili<sup>‡1</sup>, Alessia Amodio<sup>‡1,2</sup>, Marco Vidonis<sup>3</sup>, Jacob Feinberg-Somerson<sup>4</sup>, Matteo  
Castronovo<sup>\*2,3,5</sup>, Francesco Ricci<sup>\*1</sup>*

<sup>1</sup>Dipartimento di Scienze e Tecnologie Chimiche, University of Rome, Tor Vergata, Via della Ricerca Scientifica 1, 00133, Rome, Italy; <sup>2</sup>PhD School of Nanotechnology, Department of Physics, University of Trieste, Via Valerio, 2, 34127, Trieste, Italy; <sup>3</sup>Department of Medical and Biological Science and Engineering, University of Udine, Piazzale Kolbe 4, 3310, Udine, Italy; <sup>4</sup>Interdepartmental, Program in Biomolecular, Science and Engineering, University of California, Santa Barbara, CA 93106 USA; <sup>5</sup>CRO Aviano - National Cancer Institute, Via Franco Gallini 2, 3308 Aviano, Italy.

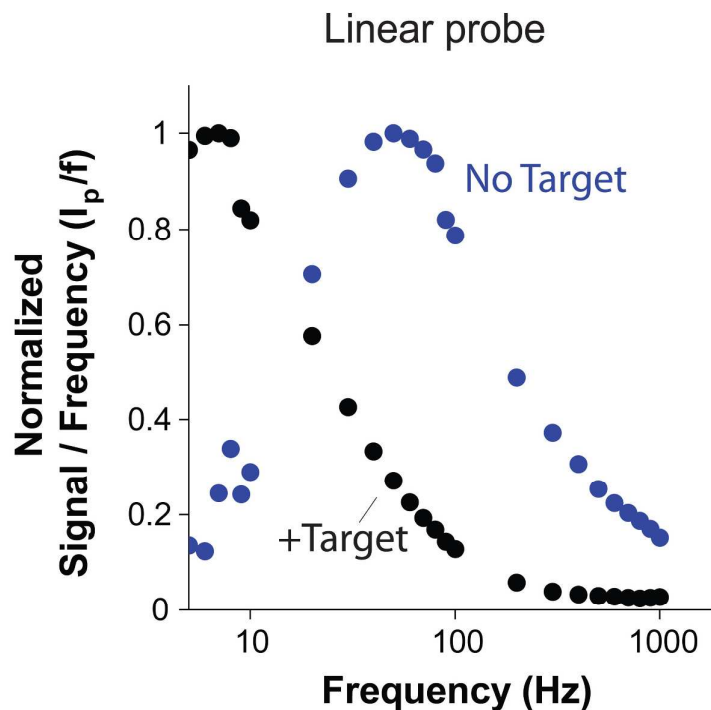

**Figure S1.** The ratio of peak current to SWV frequency ( $i_p/f$ ) as a function of the inverse of the SWV frequency ( $1/f$ ) exhibits a maxima at a critical frequency related to the apparent electron transfer rate. Target binding causes a shift in this critical frequency to lower frequencies. This kind of behavior is typical of the signal-off sensors.<sup>1</sup> By courtesy of Prof. K.W. Plaxco.

## References

- 1) White, R. J.; Plaxco, K. W. *Anal. Chem.* **2010**, *82*, 73–76.
